# Supplementary material
Source: PubMed Central journal article supplement (PMC3647337)
Supplement: NIHMS460873-supplement-Supplemental_Data.pdf [file NIHMS460873-supplement-Supplemental_Data.pdf]

**Table S1.** Effects of 16S rRNA mutations isolated in the genetic screen on translation from ACG, AUC and AUG.

| 16S allele <sup>a</sup> | β-galactosidase activity <sup>b</sup> |           |            | Relative translation level <sup>c</sup> |                 |
|-------------------------|---------------------------------------|-----------|------------|-----------------------------------------|-----------------|
|                         | ACG                                   | AUC       | AUG        | ACG/AUG                                 | AUC/AUG         |
| Control                 | 3.1 ± 0.2                             | 8.0 ± 0.4 | 2300 ± 80  | 0.0014 ± 0.0001                         | 0.0035 ± 0.0002 |
| U13G                    | 6.6 ± 0.1                             | 13 ± 0.6  | 1500 ± 60  | 0.0043 ± 0.0002                         | 0.0087 ± 0.0005 |
| U789C                   | 5.0 ± 0.2                             | 9.9 ± 0.1 | 500 ± 30   | 0.0092 ± 0.0006                         | 0.018 ± 0.0009  |
| A790G                   | 7.2 ± 0.1                             | 13 ± 0.1  | 500 ± 60   | 0.014 ± 0.002                           | 0.025 ± 0.003   |
| G886A                   | 8.6 ± 0.1                             | 16 ± 0.1  | 1800 ± 50  | 0.0047 ± 0.0002                         | 0.0088 ± 0.0003 |
| U1083C                  | 4.5 ± 0.1                             | 11 ± 0.2  | 1700 ± 80  | 0.0026 ± 0.0001                         | 0.0062 ± 0.0003 |
| A1092G                  | 4.3 ± 0.1                             | 11 ± 0.2  | 1800 ± 30  | 0.0023 ± 0.0001                         | 0.0058 ± 0.0001 |
| G1094A                  | 4.3 ± 0.1                             | 9.1 ± 0.4 | 1000 ± 100 | 0.0043 ± 0.0004                         | 0.0089 ± 0.001  |
| C1389U                  | 5.0 ± 0.03                            | 12 ± 0.1  | 1900 ± 90  | 0.0026 ± 0.0001                         | 0.0059 ± 0.0003 |
| A1408G                  | 5.0 ± 0.01                            | 12 ± 0.7  | 1600 ± 100 | 0.0031 ± 0.0002                         | 0.0075 ± 0.0006 |
| A1410G                  | 8.5 ± 0.1                             | 15 ± 0.5  | 1300 ± 30  | 0.0067 ± 0.0002                         | 0.012 ± 0.0005  |
| C1411U                  | 4.2 ± 0.03                            | 8.9 ± 0.3 | 1200 ± 10  | 0.0034 ± 0.0001                         | 0.0071 ± 0.0003 |
| U1414C                  | 7.7 ± 0.5                             | 15 ± 0.1  | 1900 ± 100 | 0.0041 ± 0.0003                         | 0.0080 ± 0.0004 |
| G1486A                  | 4.9 ± 0.1                             | 9.7 ± 0.1 | 2200 ± 20  | 0.0022 ± 0.0001                         | 0.0045 ± 0.0001 |

<sup>a</sup>Each 16S allele contains the specialized SD\* sequence to allow specific translation of the *lacZ* reporter gene.

<sup>b</sup>Specialized 16S rRNA (without or with mutations as indicated) was expressed in indicator strains KLF2522, KLF2526 and KLF2528 (harboring SD\*-ACG-*lacZ*, SD\*-AUC-*lacZ*, or SD\*-AUG-*lacZ*, respectively) and specific β-galactosidase activity (based on cleavage of CPRG) was measured. Values represent the mean ± SEM (arbitrary units) of at least 3 independent experiments.

<sup>c</sup>Values represent the quotient of two means ± standard error.

**Table S2.** Effects of engineered mutations in h44 on translation of *lacZ* from ACG, AUC and AUG.

| 16S allele <sup>a</sup> | β-galactosidase activity <sup>b</sup> |            |            | Relative translation level <sup>c</sup> |                 |
|-------------------------|---------------------------------------|------------|------------|-----------------------------------------|-----------------|
|                         | ACG                                   | AUC        | AUG        | ACG/AUG                                 | AUC/AUG         |
| Control                 | 3.1 ± 0.2                             | 8.0 ± 0.4  | 2300 ± 80  | 0.0014 ± 0.0001                         | 0.0035 ± 0.0002 |
| A1413C                  | 8.6 ± 0.7                             | 21 ± 0.5   | 1600 ± 200 | 0.0055 ± 0.0007                         | 0.014 ± 0.002   |
| A1413G                  | 1.7 ± 0.6                             | 7.0 ± 0.7  | 2000 ± 100 | 0.0009 ± 0.0003                         | 0.0035 ± 0.0004 |
| U1414G                  | 1.9 ± 0.5                             | 5.2 ± 0.6  | 800 ± 200  | 0.0023 ± 0.0008                         | 0.0064 ± 0.001  |
| G1486C                  | 1.5 ± 0.03                            | 3.3 ± 0.5  | 1100 ± 200 | 0.0014 ± 0.0003                         | 0.0029 ± 0.0007 |
| G1487U                  | 5.5 ± 0.6                             | 12 ± 0.2   | 1800 ± 100 | 0.0030 ± 0.0004                         | 0.0063 ± 0.0004 |
| G1487A                  | 0.7 ± 0.2                             | 1.7 ± 0.2  | 1700 ± 100 | 0.0004 ± 0.0001                         | 0.0010 ± 0.0001 |
| U1490C                  | 4.7 ± 0.5                             | 9.9 ± 0.06 | 550 ± 100  | 0.0086 ± 0.002                          | 0.018 ± 0.004   |
| U1414G-G1486C           | 5.0 ± 0.5                             | 14 ± 0.6   | 2000 ± 200 | 0.0024 ± 0.0004                         | 0.0067 ± 0.0008 |
| A1410G-G1490C           | 2.6 ± 0.6                             | 6.1 ± 0.4  | 1500 ± 300 | 0.0017 ± 0.0005                         | 0.0039 ± 0.0009 |

<sup>a</sup>Each 16S allele contains the specialized SD\* sequence to allow specific translation of the *lacZ* reporter gene.

<sup>b</sup>Specialized 16S rRNA (without or with mutations as indicated) was expressed in indicator strains KLF2522, KLF2526 and KLF2528 (harboring SD\*-ACG-*lacZ*, SD\*-AUC-*lacZ*, or SD\*-AUG-*lacZ*, respectively) and specific β-gal activity (based on cleavage of CPRG) was measured. Values represent the mean ± SEM (arbitrary units) of at least 3 independent experiments.

<sup>c</sup>Values represent the quotient of two means ± standard error.
